# Supplementary material
Source: MDPI journal article supplement (https://www.mdpi.com/1099-4300/15/10/4066)

$L$ 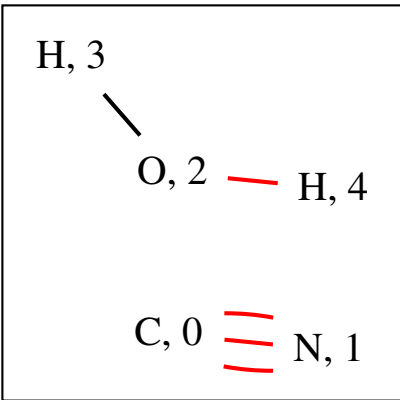 $K$ 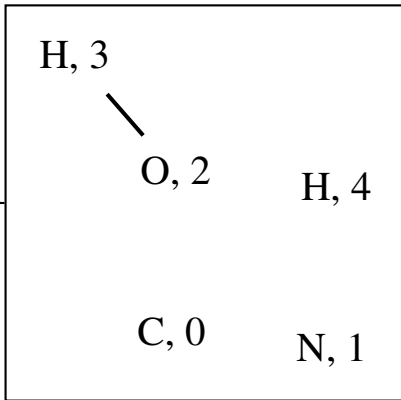 $R$ 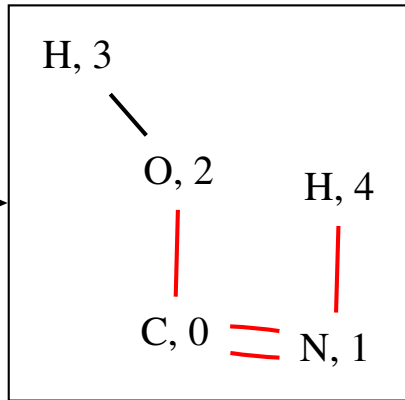

Supplement: s1 [file s1]

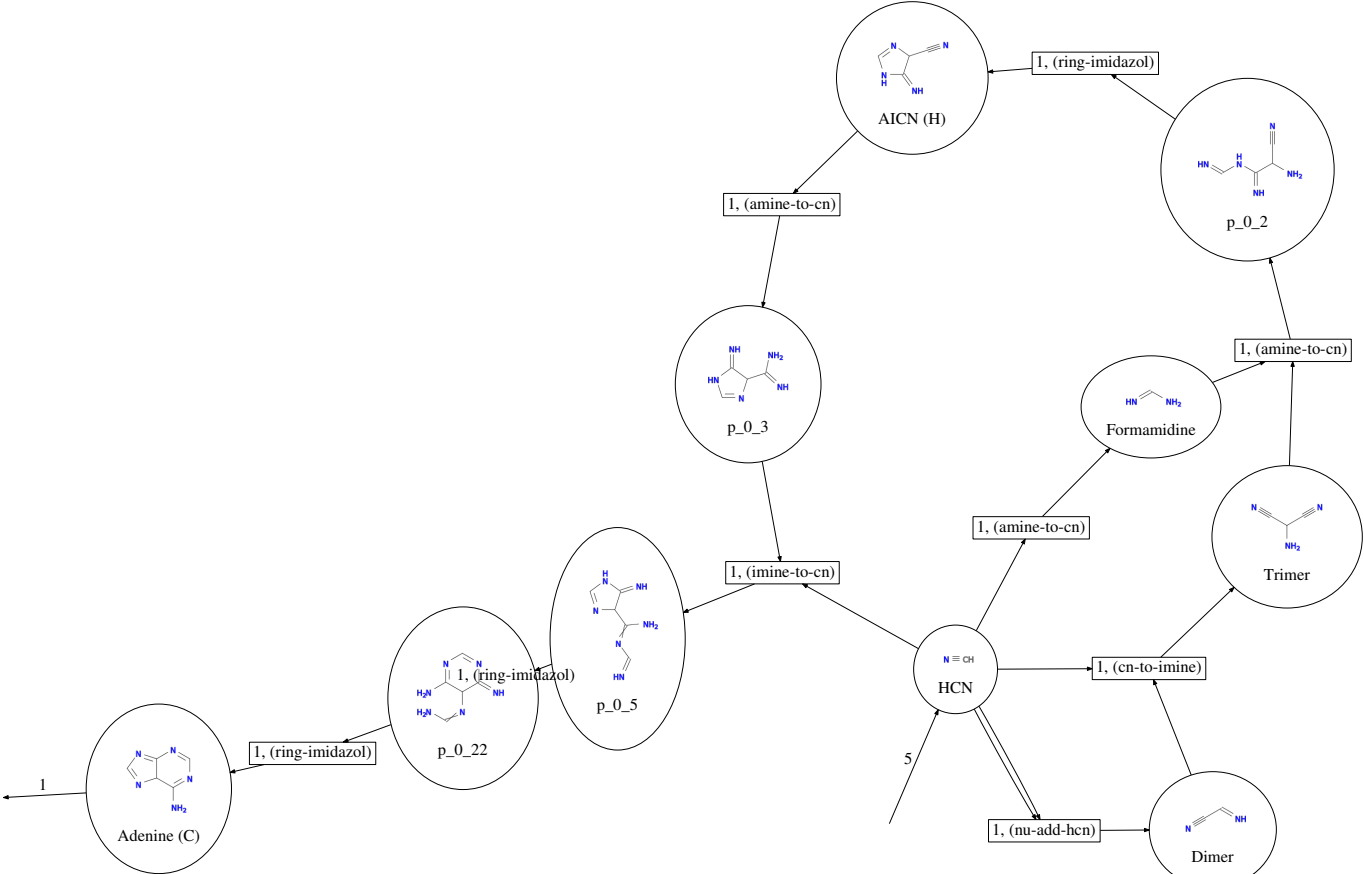

Supplement: s1 [file s1]

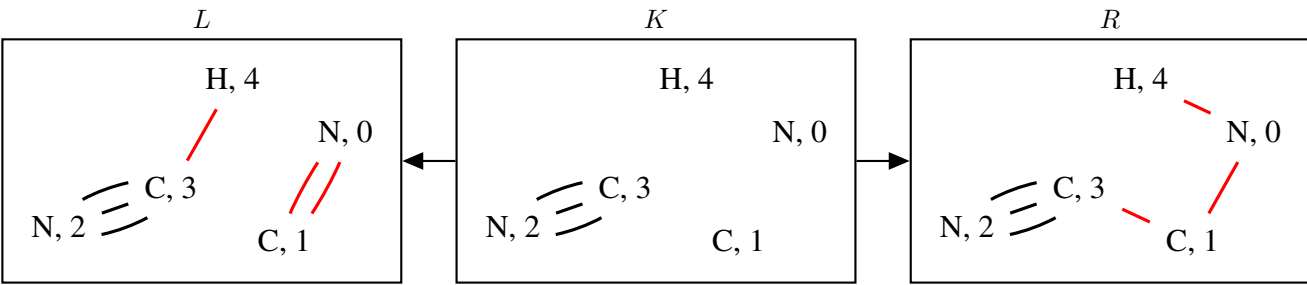

Supplement: s1 [file s1]

$L$ 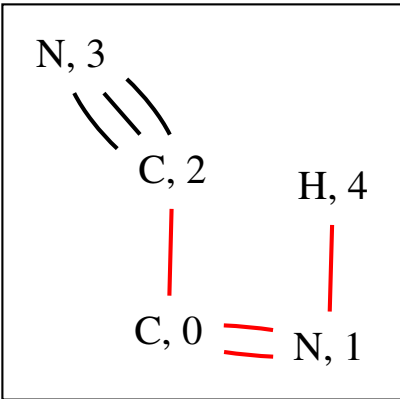 $K$ 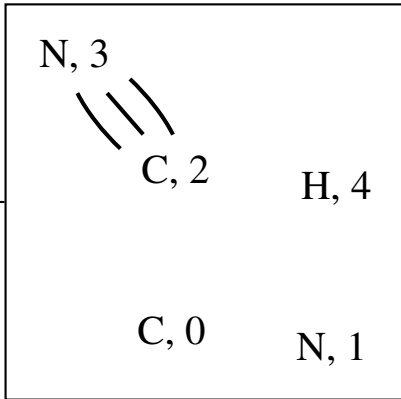 $R$ 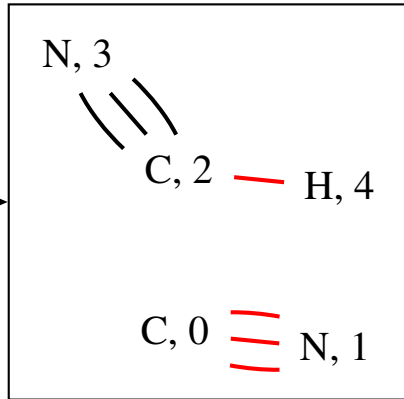

Supplement: s1 [file s1]

$L$ 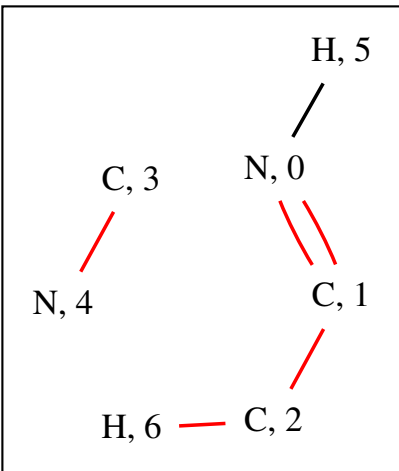 $K$ 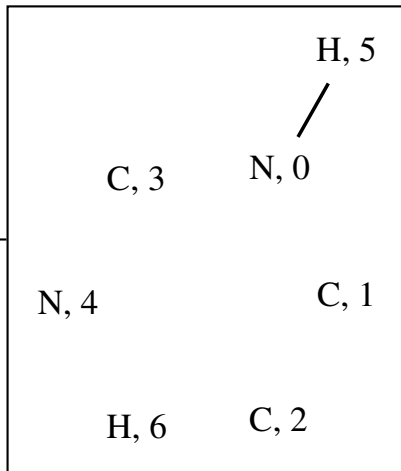 $R$ 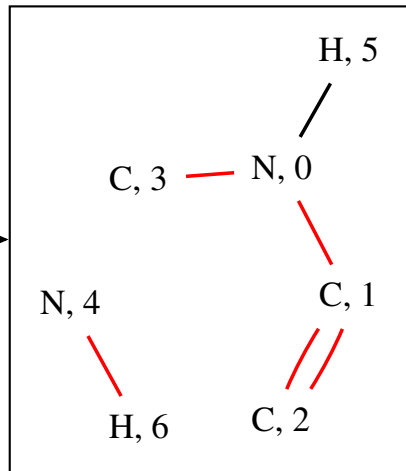

Supplement: s1 [file s1]

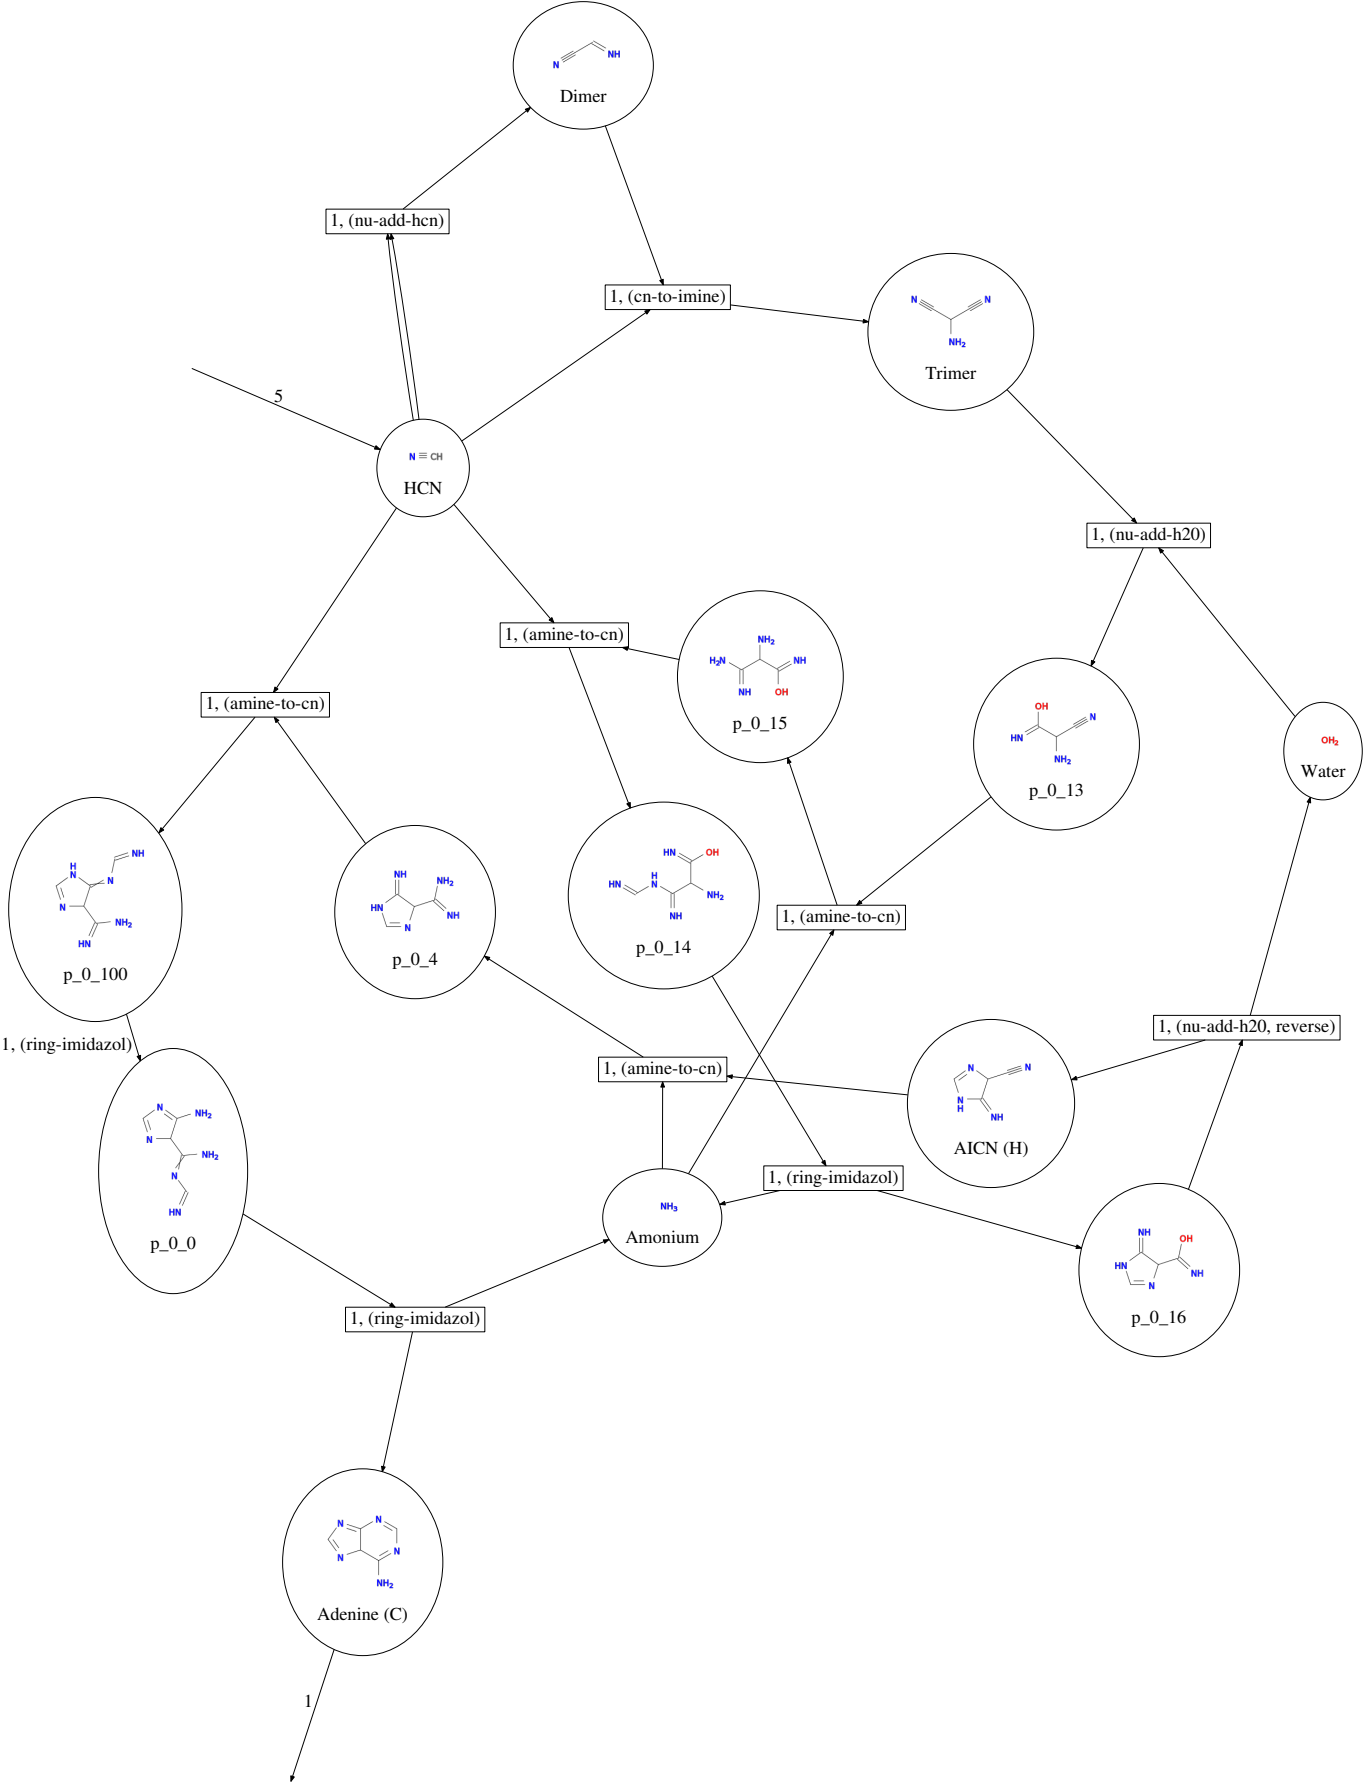

Supplement: s1 [file s1]

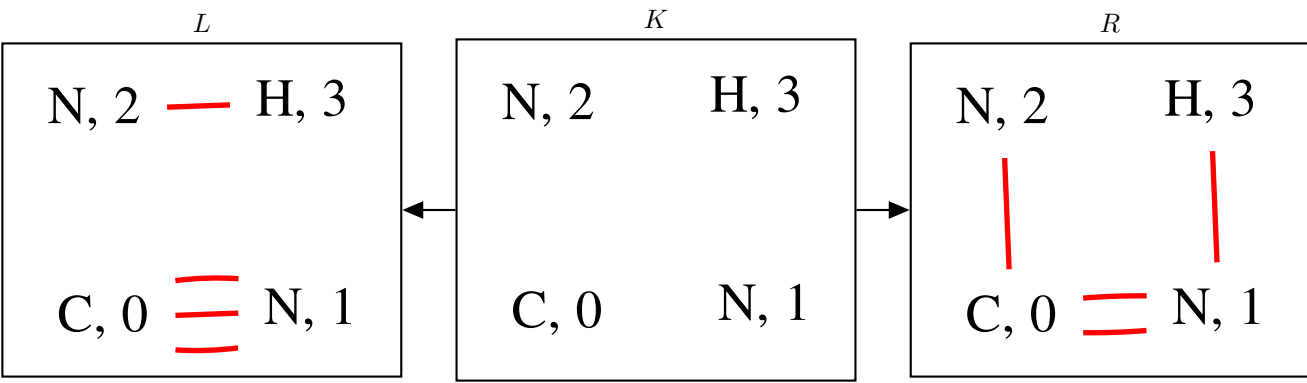

Supplement: s1 [file s1]

$L$ 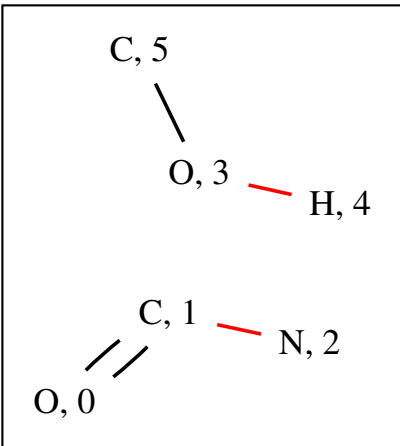 $K$ 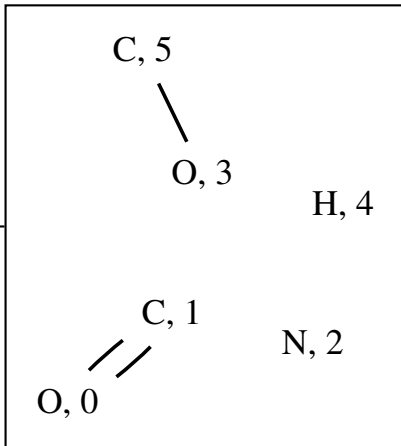 $R$ 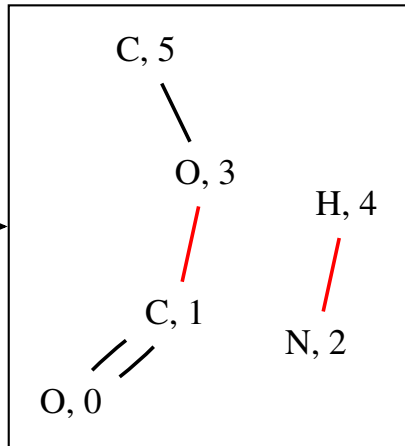

Supplement: s1 [file s1]

$L$ 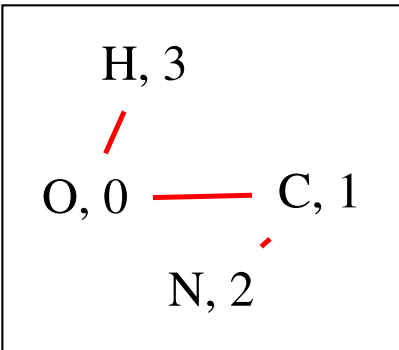 $K$ 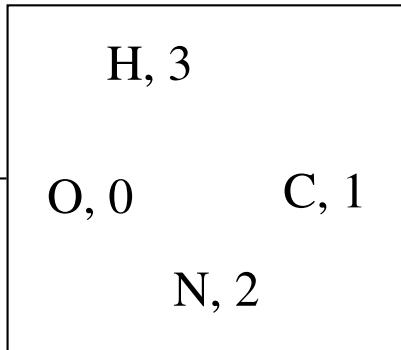 $R$ 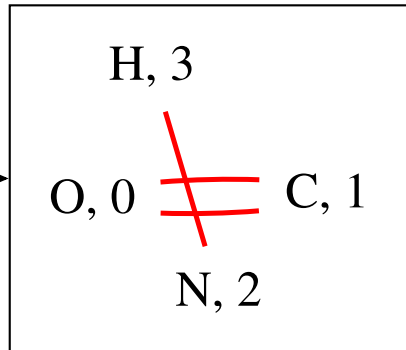

Supplement: s1 [file s1]

$L$ 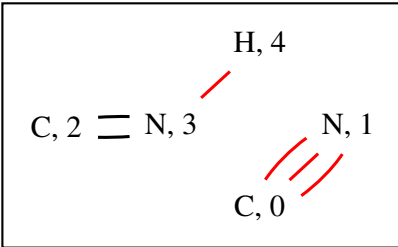 $K$ 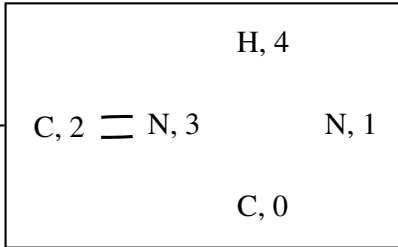 $R$ 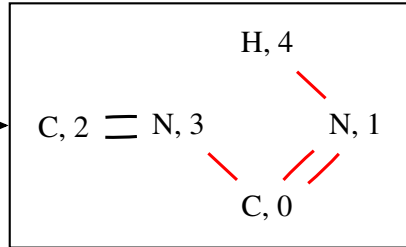

Supplement: s1 [file s1]

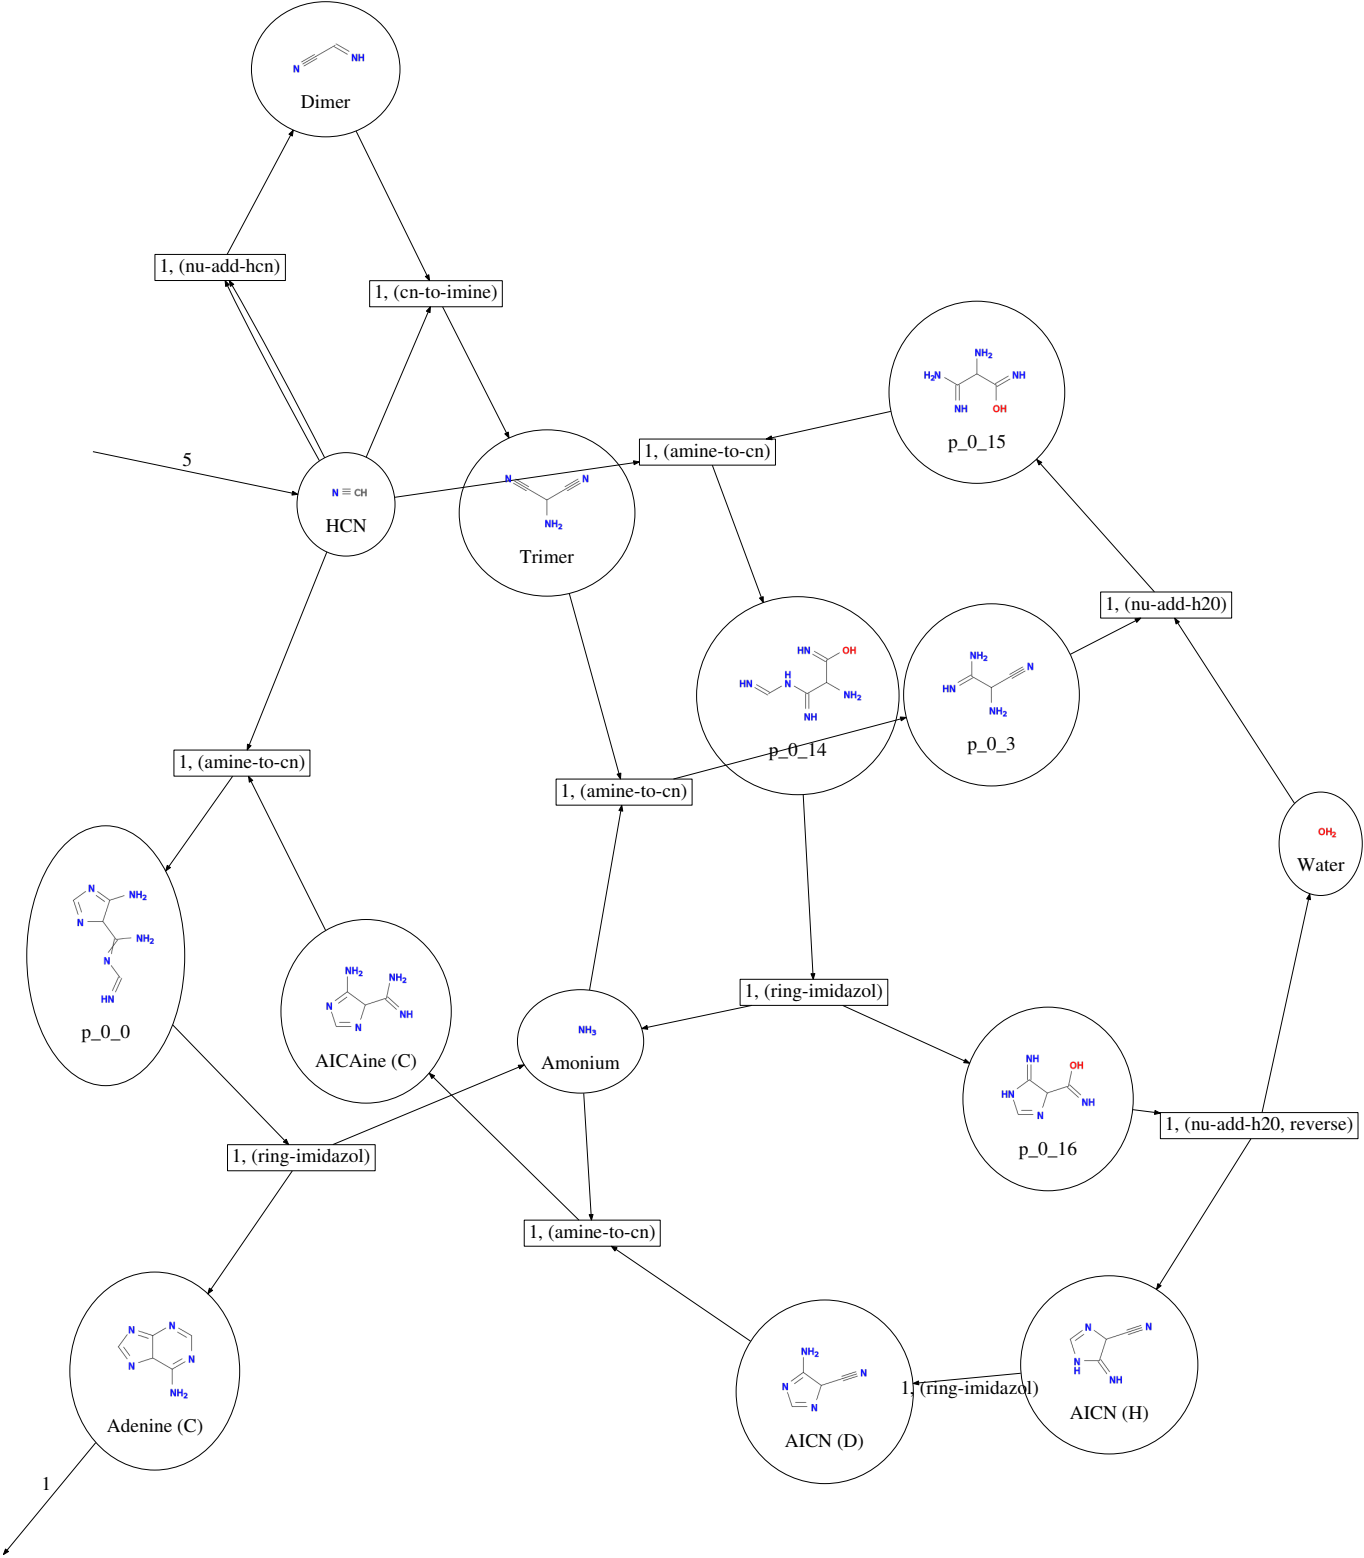

Supplement: s1 [file s1]

$L$ 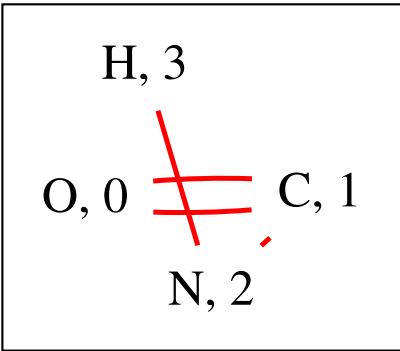 $K$ 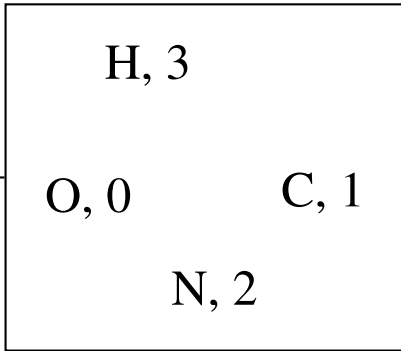 $R$ 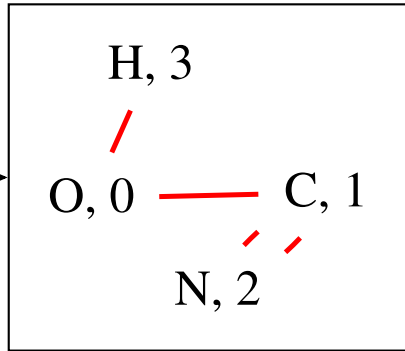

Supplement: s1 [file s1]

$L$ 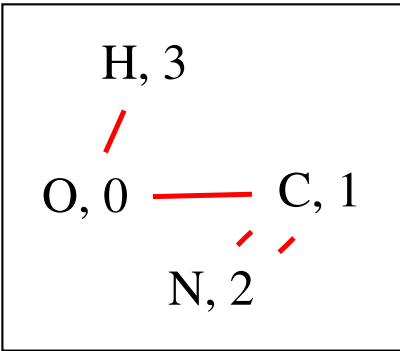 $K$ 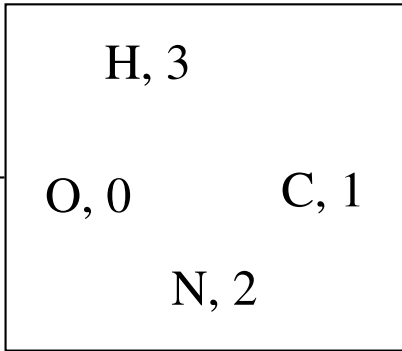 $R$ 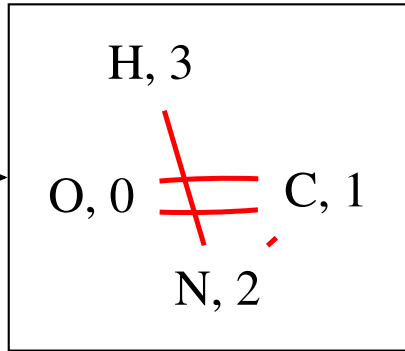

Supplement: s1 [file s1]

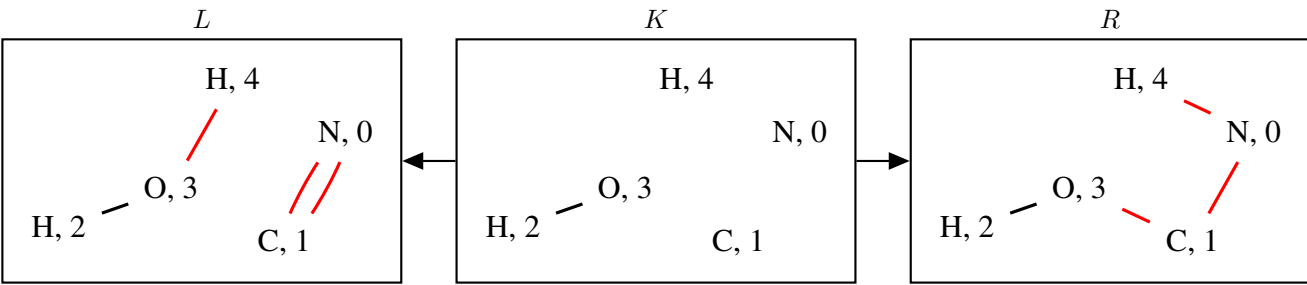

Supplement: s1 [file s1]

$L$ 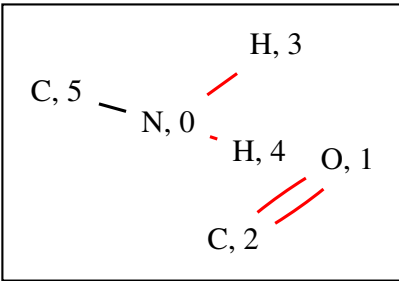 $K$ 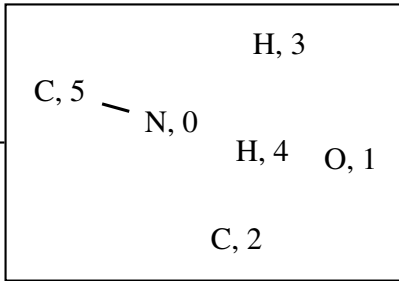 $R$ 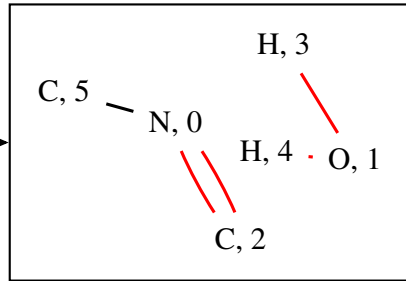

Supplement: s1 [file s1]

$L$ 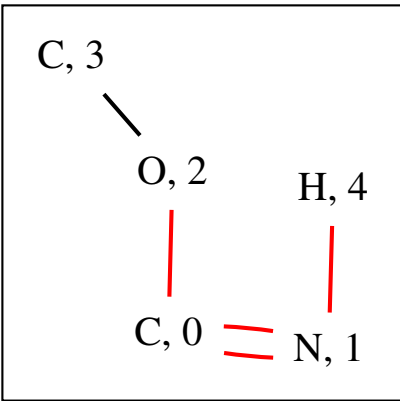 $K$ 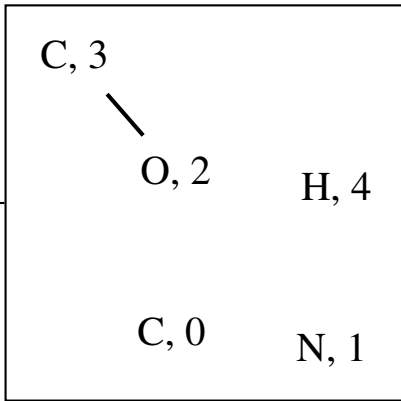 $R$ 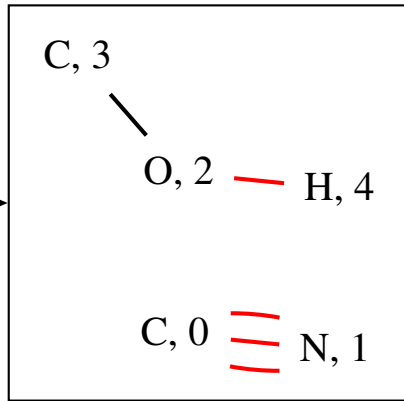

Supplement: s1 [file s1]

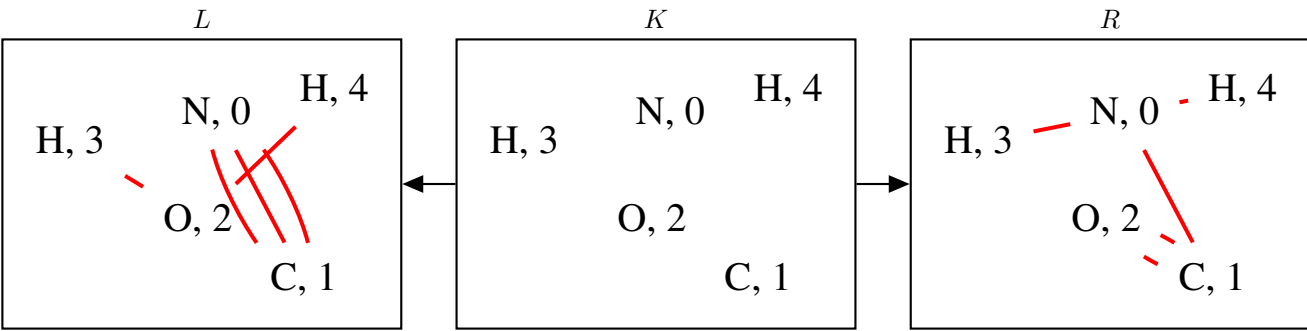

Supplement: s1 [file s1]

$L$ 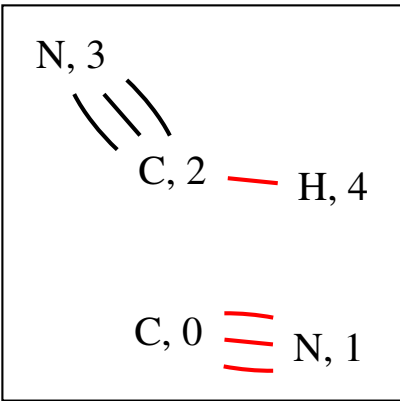 $K$ 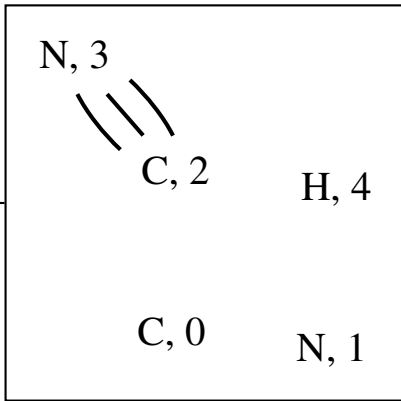 $R$ 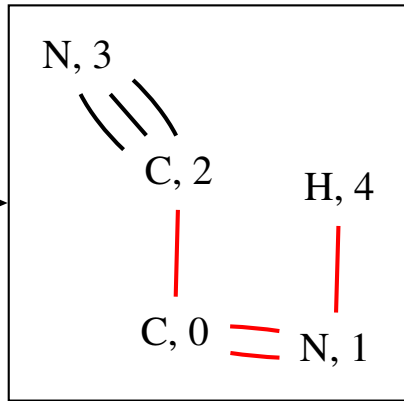

Supplement: s1 [file s1]

$L$ 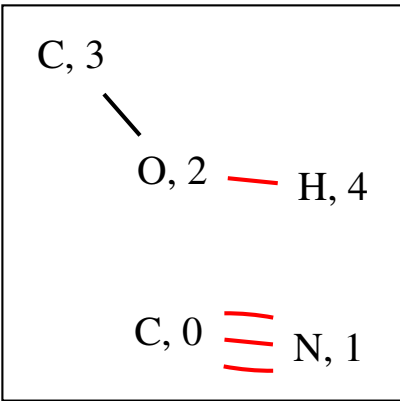 $K$  $R$ 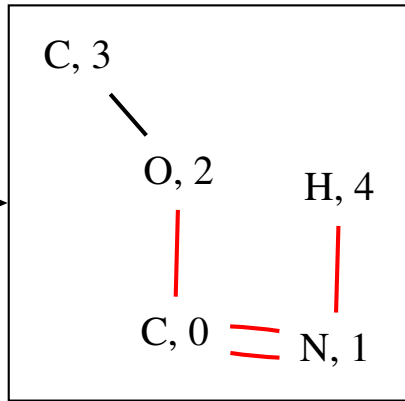

Supplement: s1 [file s1]

$L$ 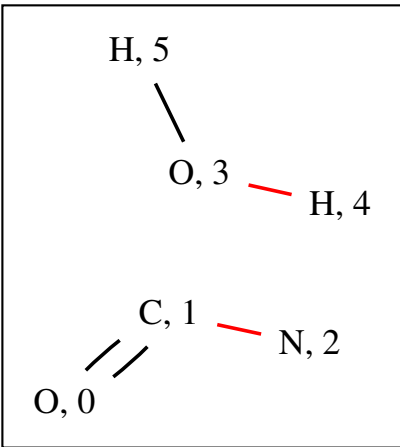 $K$ 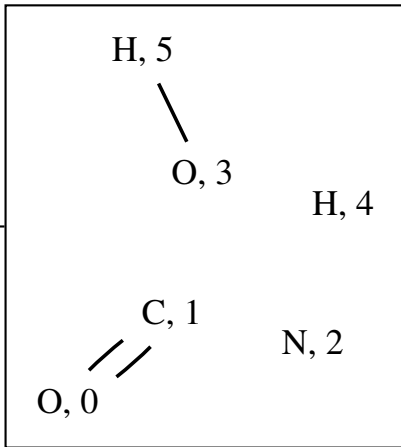 $R$ 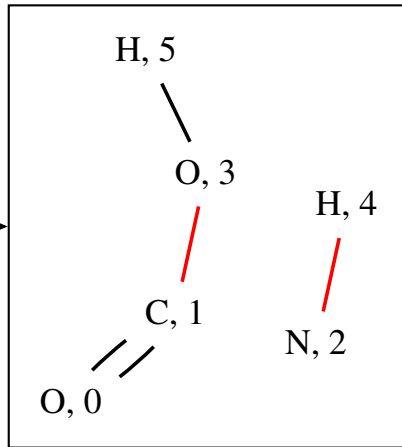

Supplement: s1 [file s1]

$L$ 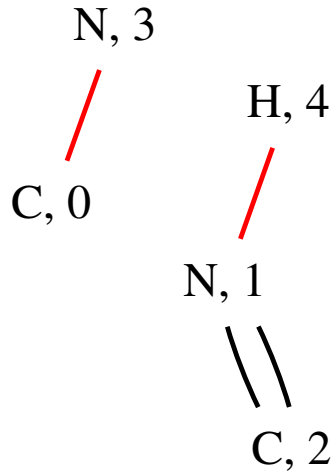 $K$ 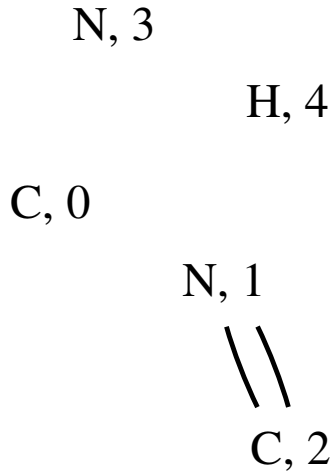 $R$ 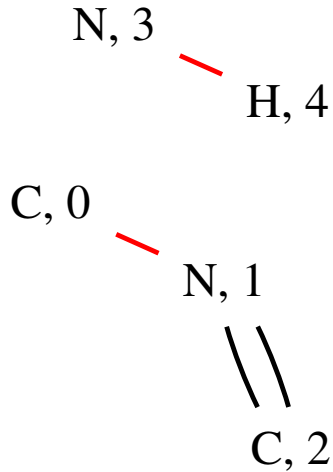

Supplement: s1 [file s1]

$L$ 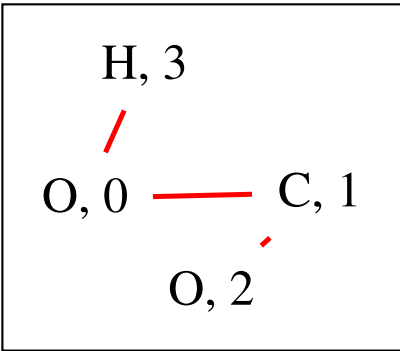 $K$ 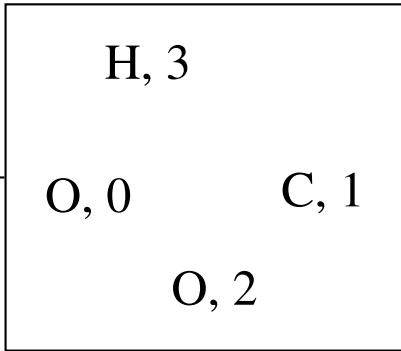 $R$ 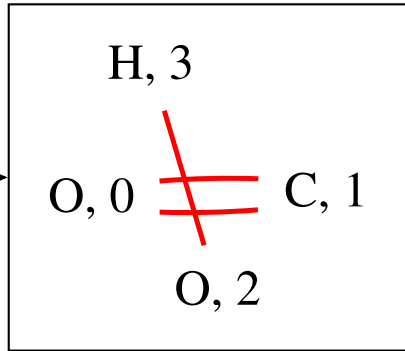

Supplement: s1 [file s1]

$L$ 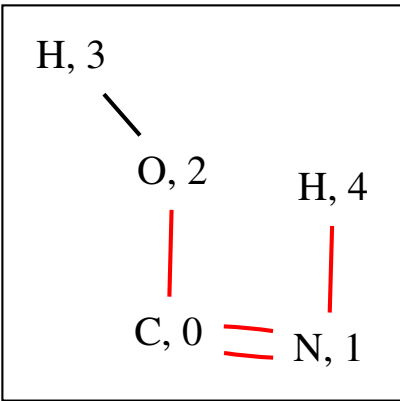 $K$ 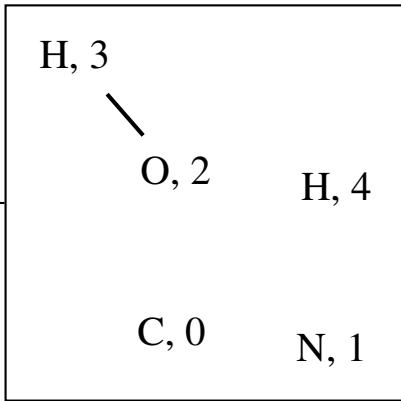 $R$ 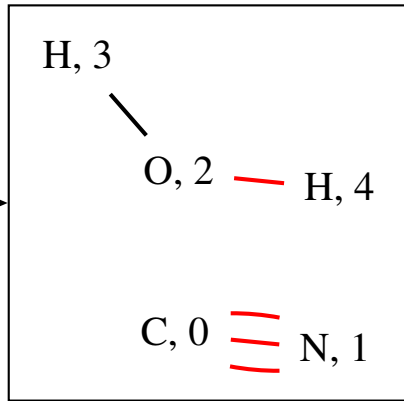

Supplement: s1 [file s1]

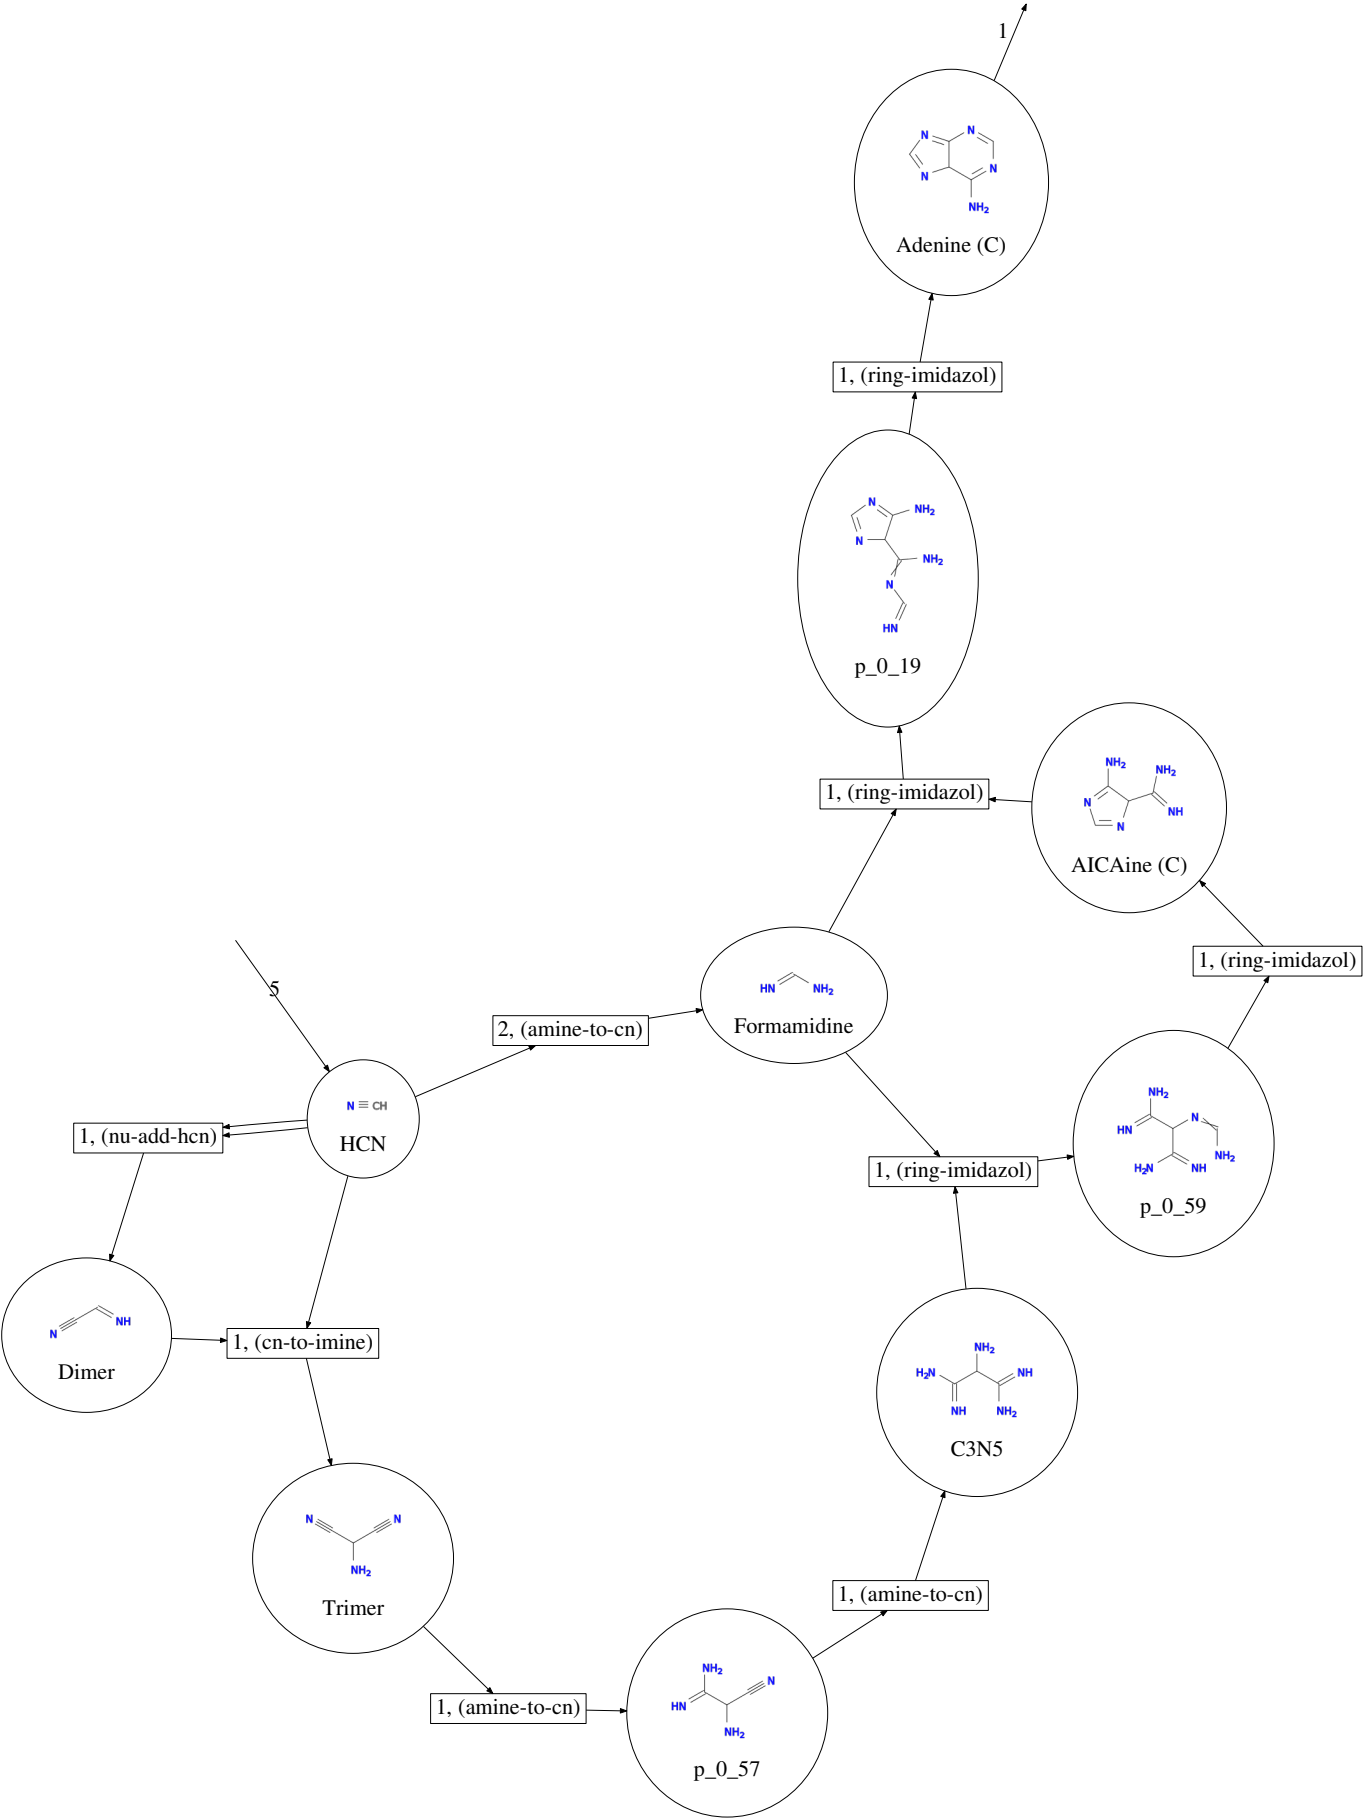

Supplement: s1 [file s1]

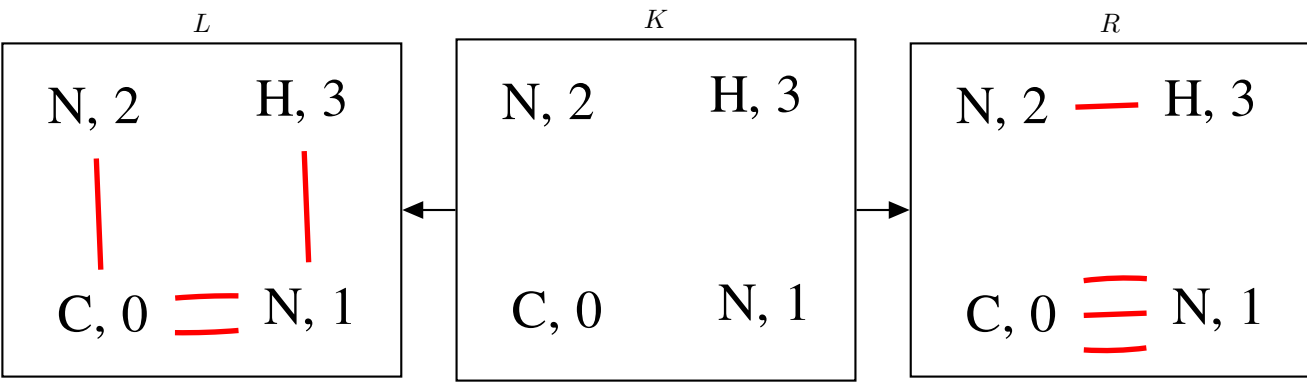

Supplement: s1 [file s1]

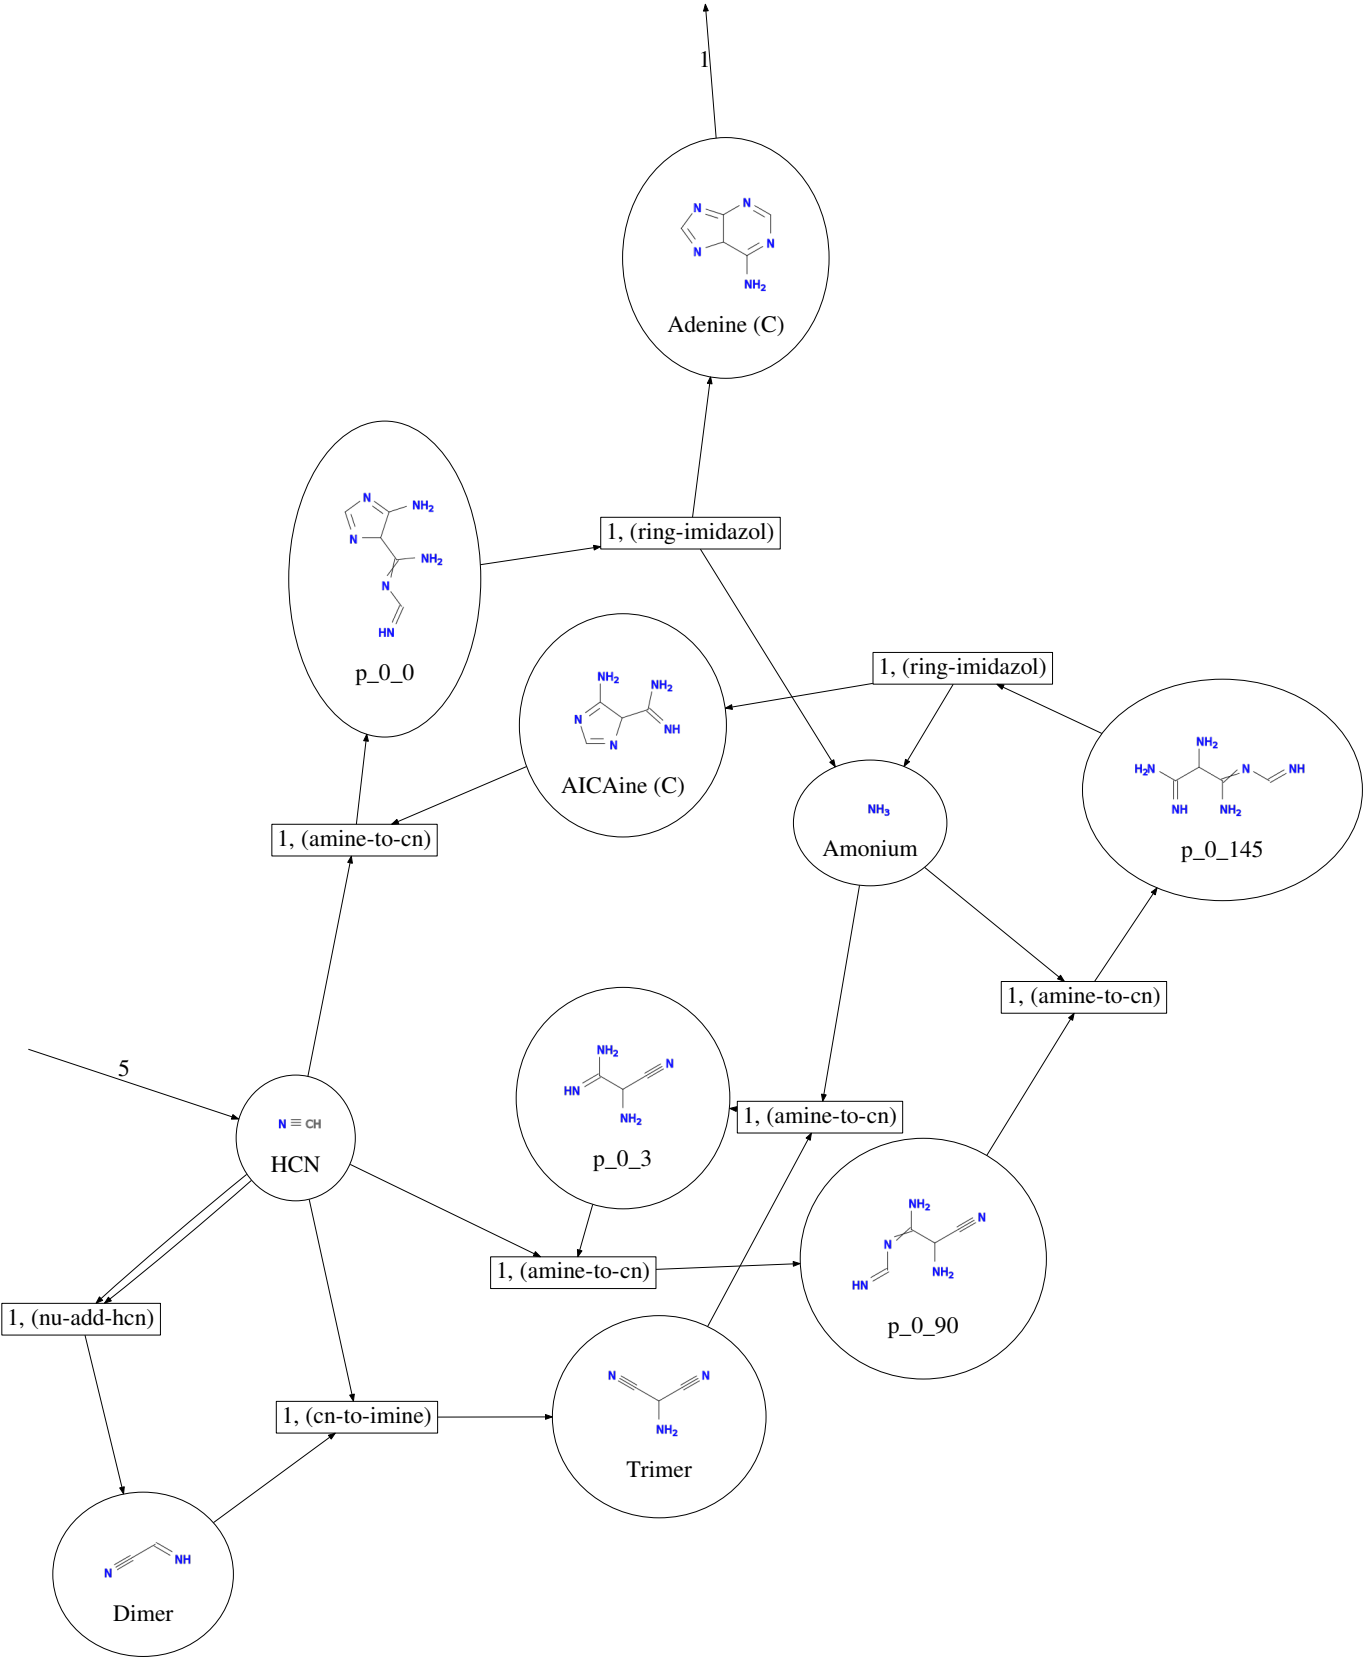

Supplement: s1 [file s1]
